# Supplementary material for: A highly selective ratiometric bifunctional fluorescence probe for Hg2+and F−ions
Source: Royal Society of Chemistry journal article supplement (doi:10.1039/c4ob02593h), 2015-01-01

## Supporting Information

### **A highly selective ratiometric bifunctional fluorescence probe for Hg<sup>2+</sup> and F<sup>-</sup> ions**

Qing-Wen Xu, Chen Wang, Zuo-Bang Sun and Cui-Hua Zhao\*

*School of Chemistry and Chemical Engineering, Key Laboratory of Special Functional Aggregated Materials,  
Ministry of Education, Shandong University, Jinan 250100, Jinan, People's Republic of China.*

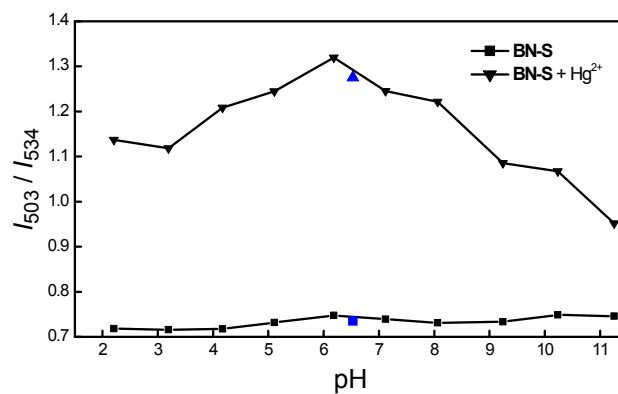

**Fig. S-1** Effect of pH on the fluorescence ratio ( $I_{503}/I_{534}$ ) of **BN-S** (52.6  $\mu$ M) in buffered water in the absence and presence of 30 equiv.  $Hg^{2+}$  (chloride salt). The blue points correspond to those in unbuffered water.

<sup>1</sup>H NMR of **BN-S** (300 MHz, CDCl<sub>3</sub>)

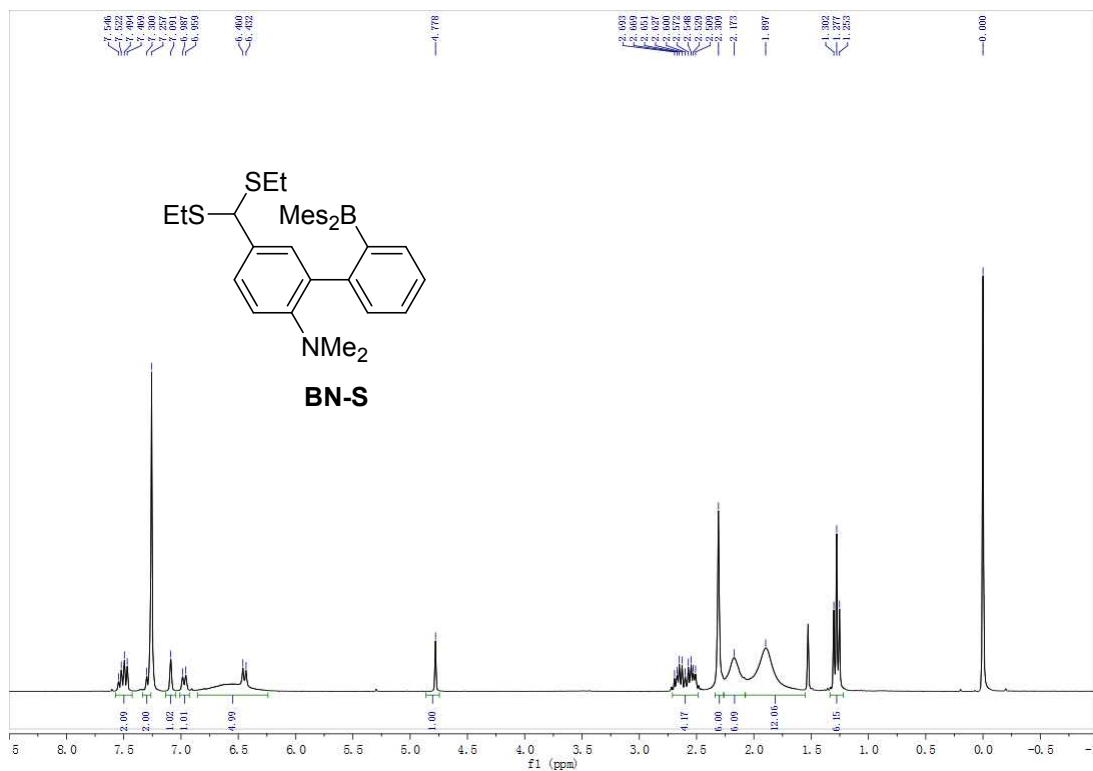

<sup>13</sup>C NMR of **BN-S** (100 MHz, CDCl<sub>3</sub>)

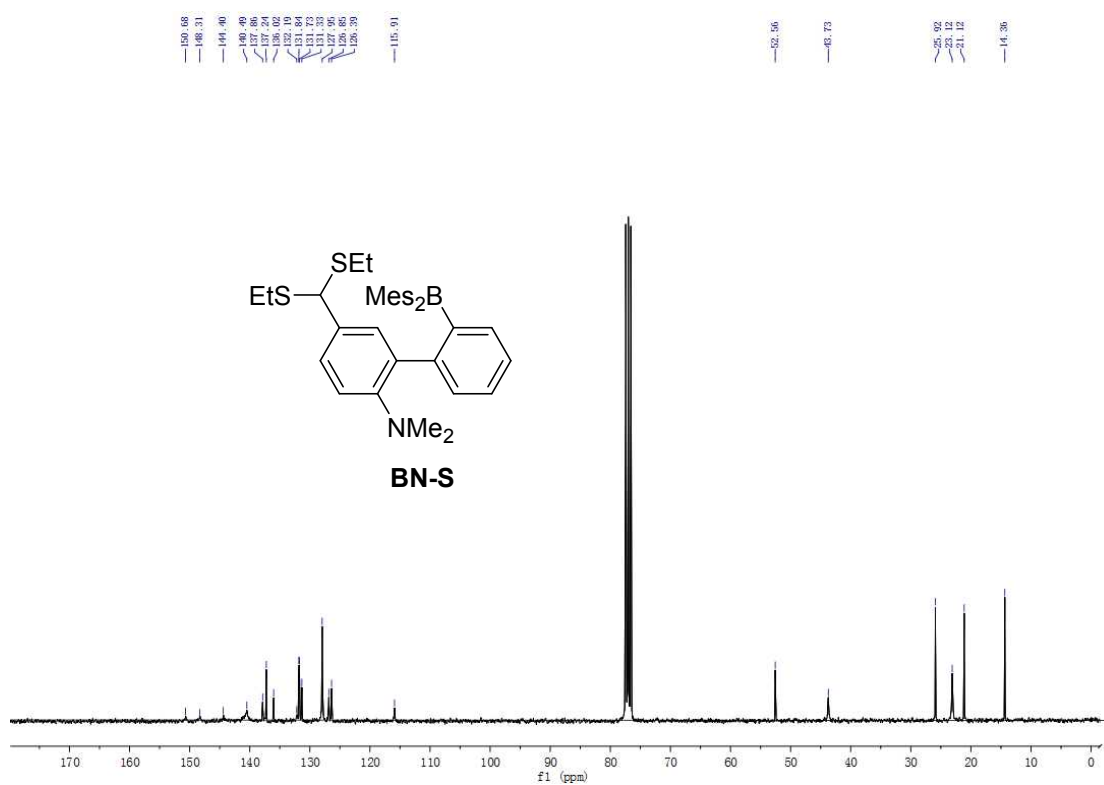

## HRMS of **BN-S** (ESI)

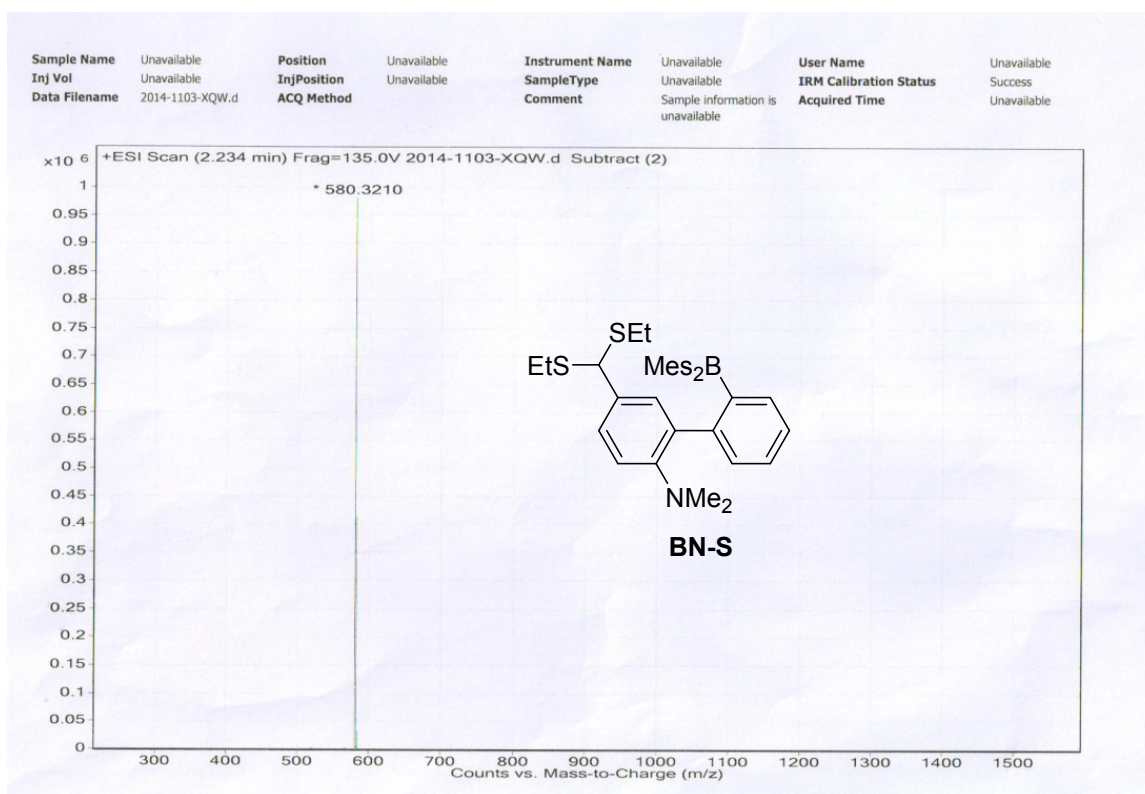

Supplement: c4ob02593h1.pdf [file c4ob02593h1.pdf]
